# Supplementary material for: Tumour-stroma ratio outperforms tumour budding as biomarker in colon cancer: a cohort study
Source: Springer Nature journal article supplement (doi:10.1007/s00384-021-04023-4), 2021-09-17
Supplement: MOESM1 [file 19673682]

*Tumour-stroma ratio outperforms tumour budding as biomarker in colon cancer; a cohort study.*  
*International Journal of Colorectal Disease 2021.*

Marloes A Smit, et al. Corresponding author J. Han. JM van Krieken [Han.vanKrieken@radboudumc.nl](mailto:Han.vanKrieken@radboudumc.nl)

---

**Supplementary table 1: In- and exclusion criteria**

| Inclusion criteria   | Exclusion criteria                                                                      |
|----------------------|-----------------------------------------------------------------------------------------|
| pStage II and III    | Age <18                                                                                 |
| H&E slides available | Rectal cancer                                                                           |
|                      | Neoadjuvant treatment                                                                   |
|                      | Medical history of cancer 10 years prior to colon cancer or any colon cancer in history |
|                      | Double tumours                                                                          |
|                      | Deceased within 30 days after surgery                                                   |
