# Supplementary material for: Tumour-stroma ratio outperforms tumour budding as biomarker in colon cancer: a cohort study
Source: Springer Nature journal article supplement (doi:10.1007/s00384-021-04023-4), 2021-09-17
Supplement: MOESM2 [file 19673682]

*Tumour-stroma ratio outperforms tumour budding as biomarker in colon cancer; a cohort study.*  
*International Journal of Colorectal Disease 2021.*

Marloes A Smit, et al. Corresponding author J. Han. JM van Krieken [Han.vanKrieken@radboudumc.nl](mailto:Han.vanKrieken@radboudumc.nl)

---

**Supplementary table 2:** The association between tumour-stroma ratio and tumour budding. (Chi-square  $p=0.001$ )

|                |              | Tumour-stroma ratio |             | Total |
|----------------|--------------|---------------------|-------------|-------|
|                |              | Stroma-low          | Stroma-high |       |
| Tumour budding | Low          | 120 (88%)           | 74 (68%)    | 194   |
|                | Intermediate | 10 (7%)             | 25 (23%)    | 35    |
|                | High         | 7 (5%)              | 10 (9%)     | 17    |
| Total          |              | 137                 | 109         | 246   |
